# Supplementary material for: Differential Regulation of Lacto-/Neolacto- Glycosphingolipid Biosynthesis Pathway Reveals Transcription Factors as Potential Candidates in Triple-Negative Breast Cancer
Source: Cancers (Basel). 2021 Jul 2;13(13):3330. doi: 10.3390/cancers13133330 (PMC8268693; doi:10.3390/cancers13133330)
Supplement: Supplementary file 1 [file cancers-13-03330-s001.zip › Revised supplemental files/Zeng Supplemental Tables Revised.xlsx]

## Sheet: Contents
Supplemental tables for
Differential regulation of lacto-/neolacto- glycosphingolipid biosynthesis pathway reveals transcription factors as potential candidates in triple negative breast cancer
Ruichao Zeng1, Ahmed Mohamed1, Kum Kum Khanna2 and Michelle M. Hill1,*
Table S1. The list of 345 glycogenes.
Table S2. The distribution of 34 TNBC-specific glycogenes in KEGG and functional pathways.
Table S3. Multivariate Cox analysis for OS and RFS within TNBC samples from TCGA dataset.
Table S4. The top 10 glycogenes with most differential correlation between glycogenes and CNA/DM.
Table S5. TNBC-specific TF network.

## Sheet: Table S1
Table S1. The list of 345 glycogenes.
Gene symbol	Entrez ID	Function category	Gene symbol	Entrez ID	Function category	Gene symbol	Entrez ID	Function category	Gene symbol	Entrez ID	Function category
A4GALT	53947	anabolic	COG2	22796	miscellaneous	GYG2	8908	anabolic	PIGG	54872	anabolic
ABO	28	anabolic	COG3	83548	miscellaneous	GYS1	2997	miscellaneous	PIGH	5283	anabolic
ACAN	176	miscellaneous	COG4	25839	miscellaneous	HAS1	3036	anabolic	PIGK	10026	anabolic
AGA	175	catabolic	COG5	10466	miscellaneous	HAS2	3037	anabolic	PIGL	9487	anabolic
ALG1	56052	anabolic	COG6	57511	miscellaneous	HAS3	3038	anabolic	PIGM	93183	anabolic
ALG10B	144245	anabolic	COG7	91949	miscellaneous	HEXA	3073	catabolic	PIGN	23556	anabolic
ALG11	440138	anabolic	COG8	84342	miscellaneous	HEXB	3074	catabolic	PIGO	84720	anabolic
ALG12	79087	anabolic	COLEC12	81035	glycan-binding	HEXDC	284004	catabolic	PIGP	51227	anabolic
ALG13	79868	anabolic	COLEC11	78989	glycan-binding	HGSNAT	138050	anabolic	PIGQ	9091	anabolic
ALG14	199857	anabolic	CSGALNACT1	55790	anabolic	HPSE	10855	catabolic	PIGR	5284	miscellaneous
ALG2	85365	anabolic	DAD1	1603	anabolic	HPSE2	60495	catabolic	PIGS	94005	anabolic
ALG3	10195	anabolic	DDOST	1650	anabolic	HS2ST1	9653	anabolic	PIGT	51604	anabolic
ALG5	29880	anabolic	DHDDS	79947	anabolic	HS3ST1	9957	anabolic	PIGU	128869	anabolic
ALG6	29929	anabolic	DOLPP1	57171	anabolic	HS3ST2	9956	anabolic	PIGV	55650	anabolic
ALG8	79053	anabolic	DPAGT1	1798	anabolic	HS3ST3A1	9955	anabolic	PIGW	284098	anabolic
ALG9	79796	anabolic	DPM1	8813	anabolic	HS3ST4	9951	anabolic	PIGX	54965	anabolic
ARSB	411	catabolic	DPM2	8818	anabolic	HS6ST1	9394	anabolic	PIGY	84992	anabolic
ATRN	8455	glycan-binding	DPM3	54344	anabolic	HS6ST2	90161	anabolic	PIGZ	80235	anabolic
ATRNL1	26033	glycan-binding	DSE	29940	miscellaneous	HS6ST3	266722	anabolic	PLOD3	8985	anabolic
B3GALNT1	8706	anabolic	EDEM1	9695	catabolic	HYAL1	3373	catabolic	PMM1	5372	miscellaneous
B3GALNT2	148789	anabolic	EDEM2	55741	catabolic	HYAL2	8692	catabolic	PMM2	5373	miscellaneous
B3GALT4	8705	anabolic	EDEM3	80267	catabolic	ICAM1	3383	glycan-binding	POFUT1	23509	anabolic
B3GALT5	10317	anabolic	EIF2B5	8893	anabolic	ICAM2	3384	glycan-binding	POFUT2	23275	anabolic
B3GALT6	126792	anabolic	EXT1	2131	anabolic	ICAM3	3385	glycan-binding	POMGNT1	55624	anabolic
B3GAT1	27087	anabolic	EXT2	2132	anabolic	IDS	3423	catabolic	POMT1	10585	anabolic
B3GAT3	26229	anabolic	EXTL1	2134	anabolic	IDUA	3425	catabolic	POMT2	29954	anabolic
B3GNT2	10678	anabolic	EXTL2	2135	anabolic	KDELC1	79070	anabolic	PYGM	5837	miscellaneous
B3GNT3	10331	anabolic	EXTL3	2137	anabolic	KDELC2	143888	anabolic	RFNG	5986	anabolic
B3GNT5	84002	anabolic	FBXO27	126433	miscellaneous	KLRB1	3820	glycan-binding	RFT1	91869	anabolic
B3GNT7	93010	anabolic	FBXO44	93611	glycan-binding	KLRD1	3824	glycan-binding	RPN1	6184	anabolic
B3GNT8	374907	anabolic	FBXO6	26270	miscellaneous	KLRG1	10219	glycan-binding	RPN2	6185	anabolic
B3GNTL1	146712	anabolic	FCN1	2219	glycan-binding	KLRG2	346689	glycan-binding	SELE	6401	glycan-binding
B4GALNT1	2583	anabolic	FCN3	8547	glycan-binding	KLRK1	22914	glycan-binding	SELL	6402	glycan-binding
B4GALNT3	283358	anabolic	FKRP	79147	anabolic	L1CAM	3897	glycan-binding	SELP	6403	glycan-binding
B4GALNT4	338707	anabolic	FKTN	2218	miscellaneous	LAYN	143903	glycan-binding	SIGLEC1	6614	glycan-binding
B4GALT1	2683	anabolic	FUCA1	2517	catabolic	LFNG	3955	anabolic	SIGLEC10	89790	glycan-binding
B4GALT2	8704	anabolic	FUCA2	2519	catabolic	LGALS1	3956	glycan-binding	SIGLEC5	8778	glycan-binding
B4GALT3	8703	anabolic	FUT1	2523	anabolic	LGALS12	85329	glycan-binding	SIGLEC7	27036	glycan-binding
B4GALT4	8702	anabolic	FUT10	84750	anabolic	LGALS2	3957	glycan-binding	SIGLEC8	27181	glycan-binding
B4GALT5	9334	anabolic	FUT11	170384	anabolic	LGALS3	3958	glycan-binding	SIGLEC9	27180	glycan-binding
B4GALT6	9331	anabolic	FUT2	2524	anabolic	LGALS8	3964	glycan-binding	SLC33A1	9197	miscellaneous
B4GALT7	11285	anabolic	FUT3	2525	anabolic	LGALS9	3965	glycan-binding	SLC35A1	10559	miscellaneous
BCAN	63827	miscellaneous	FUT4	2526	anabolic	LMAN1	3998	glycan-binding	SLC35A2	7355	miscellaneous
C1GALT1	56913	anabolic	FUT6	2528	anabolic	LMAN2	10960	glycan-binding	SLC35A3	23443	miscellaneous
C1GALT1C1	29071	miscellaneous	FUT8	2530	anabolic	LMAN2L	81562	glycan-binding	SLC35B1	10237	miscellaneous
CALR	811	glycan-binding	FUT9	10690	anabolic	LY75	4065	glycan-binding	SLC35B2	347734	miscellaneous
CANX	821	glycan-binding	GAA	2548	catabolic	M6PR	4074	glycan-binding	SLC35B3	51000	miscellaneous
CD207	50489	glycan-binding	GAL	51083	anabolic	MAN1A1	4121	catabolic	SLC35B4	84912	miscellaneous
CD209	30835	glycan-binding	GAL3ST4	79690	anabolic	MAN1A2	10905	catabolic	SLC35C1	55343	miscellaneous
CD69	969	glycan-binding	GALC	2581	catabolic	MAN1B1	11253	catabolic	SLC35D1	23169	miscellaneous
CD72	971	glycan-binding	GALNS	2588	catabolic	MAN1C1	57134	catabolic	SLC35D2	11046	miscellaneous
CERCAM	51148	glycan-binding	GALNT1	2589	anabolic	MAN2A1	4124	catabolic	ST3GAL1	6482	anabolic
CHODL	140578	glycan-binding	GALNT10	55568	anabolic	MAN2A2	4122	catabolic	ST3GAL2	6483	anabolic
CHPF	79586	anabolic	GALNT11	63917	anabolic	MAN2B1	4125	catabolic	ST3GAL3	6487	anabolic
CHPF2	54480	anabolic	GALNT12	79695	anabolic	MAN2B2	23324	catabolic	ST3GAL4	6484	anabolic
CHST1	8534	anabolic	GALNT13	114805	anabolic	MAN2C1	4123	catabolic	ST3GAL5	8869	anabolic
CHST10	9486	anabolic	GALNT14	79623	anabolic	MANBA	4126	catabolic	ST3GAL6	10402	anabolic
CHST11	50515	anabolic	GALNT2	2590	anabolic	MANBAL	63905	catabolic	ST6GAL1	6480	anabolic
CHST12	55501	anabolic	GALNT5	11227	anabolic	MANEA	79694	catabolic	ST6GAL2	84620	anabolic
CHST14	113189	anabolic	GALNT6	11226	anabolic	MANEAL	149175	catabolic	ST6GALNAC1	55808	anabolic
CHST15	51363	anabolic	GALNT7	51809	anabolic	MFNG	4242	anabolic	ST6GALNAC2	10610	anabolic
CHST2	9435	anabolic	GALT	2592	anabolic	MGAT1	4245	anabolic	ST6GALNAC3	256435	anabolic
CHST3	9469	anabolic	GANAB	23193	catabolic	MGAT2	4247	anabolic	ST6GALNAC4	27090	anabolic
CHST4	10164	anabolic	GANC	2595	catabolic	MGAT3	4248	anabolic	ST6GALNAC5	81849	anabolic
CHST6	4166	anabolic	GBA	2629	catabolic	MGAT4A	11320	anabolic	ST6GALNAC6	30815	anabolic
CHST7	56548	anabolic	GBA2	57704	catabolic	MGAT4B	11282	anabolic	ST8SIA1	6489	anabolic
CHST8	64377	anabolic	GBGT1	26301	anabolic	MGAT5	4249	anabolic	ST8SIA2	8128	anabolic
CHST9	83539	anabolic	GCNT1	2650	anabolic	MGAT5B	146664	anabolic	ST8SIA4	7903	anabolic
CHSY1	22856	anabolic	GCNT2	2651	anabolic	MPDU1	9526	miscellaneous	ST8SIA6	338596	anabolic
CHSY3	337876	miscellaneous	GLA	2717	catabolic	MRC1L1	4360	glycan-binding	STT3A	3703	anabolic
CLEC10A	10462	glycan-binding	GLB1	2720	catabolic	MRC2	9902	glycan-binding	STT3B	201595	anabolic
CLEC11A	6320	glycan-binding	GLB1L	79411	catabolic	NAGA	4668	catabolic	UGCG	7357	anabolic
CLEC14A	161198	glycan-binding	GLCE	26035	miscellaneous	NAGLU	4669	catabolic	UGT2B11	10720	anabolic
CLEC16A	23274	glycan-binding	GLT8D1	55830	anabolic	NAGPA	51172	catabolic	UGT2B15	7366	anabolic
CLEC1A	51267	glycan-binding	GLT8D2	83468	anabolic	NDST1	3340	miscellaneous	UGT8	7368	anabolic
CLEC2B	9976	glycan-binding	GM2A	2760	catabolic	NDST2	8509	miscellaneous	UST	10090	anabolic
CLEC2D	29121	glycan-binding	GNPTAB	79158	anabolic	NEU1	4758	catabolic	VCAM1	7412	glycan-binding
CLEC3A	10143	glycan-binding	GNPTG	84572	anabolic	NEU3	10825	catabolic	VCAN	1462	miscellaneous
CLEC3B	7123	glycan-binding	GNS	2799	catabolic	OGT	8473	anabolic	WBSCR17	64409	anabolic
CLEC4A	50856	glycan-binding	GPAA1	8733	anabolic	OLR1	4973	glycan-binding	XYLT1	64131	anabolic
CLEC4E	26253	glycan-binding	GPLD1	2822	catabolic	PECAM1	5175	glycan-binding	XYLT2	64132	anabolic
CLEC4F	165530	glycan-binding	GTDC1	79712	anabolic	PGAP1	80055	miscellaneous	DOLK	22845	anabolic
CLEC5A	23601	glycan-binding	GUSB	2990	catabolic	PIGA	5277	anabolic	CSGALNACT2	55454	anabolic
CLEC7A	64581	glycan-binding	GXYLT1	283464	anabolic	PIGB	9488	anabolic	SGSH	6448	catabolic
CLGN	1047	glycan-binding	GXYLT2	727936	anabolic	PIGC	5279	anabolic	MOGS	7841	catabolic
COG1	9382	miscellaneous	GYG1	2992	anabolic	PIGF	5281	anabolic	TUSC3	7991	miscellaneous
									HYAL3	8372	catabolic

## Sheet: Table S2
Table S2. The distribution of 34 TNBC-specific glycogenes in KEGG and functional pathways
KEGG Pathway	Gene	Functional pathway
hsa00514 Other types of O-glycan biosynthesis	PLOD3	O-glycan biosynthesis
O-glycan, not mucin-type	B3GALNT2	O-glycan biosynthesis
hsa00512 Mucin type O-Glycan biosynthesis	C1GALT1	O-glycan biosynthesis
hsa00514 Other types of O-glycan biosynthesis	LFNG	O-glycan biosynthesis
hsa00512 Mucin type O-Glycan biosynthesis	GALNT10	O-glycan biosynthesis
hsa00511 Other glycan degradation	MAN2B2	N-glycan degradation
hsa00511 Other glycan degradation	MAN2B1	N-glycan degradation
hsa00510 N-Glycan biosynthesis	RPN1	N-glycan biosynthesis
hsa00510 N-Glycan biosynthesis	ALG3	N-glycan biosynthesis
hsa00510 N-Glycan biosynthesis	MOGS	N-glycan biosynthesis
hsa00510 N-Glycan biosynthesis	DDOST	N-glycan biosynthesis
hsa00510 N-Glycan biosynthesis	MAN1C1	N-glycan biosynthesis
hsa00510 N-Glycan biosynthesis	MGAT4B	N-glycan biosynthesis
Protein working in Golgi	GNPTG	N-glycan biosynthesis
hsa00563 Glycosylphosphatidylinositol(GPI)-anchor biosynthesis	PIGV	Glycosylphosphatidylinositol(GPI)-anchor biosynthesis
hsa00563 Glycosylphosphatidylinositol(GPI)-anchor biosynthesis	PIGB	Glycosylphosphatidylinositol(GPI)-anchor biosynthesis
hsa00563 Glycosylphosphatidylinositol(GPI)-anchor biosynthesis	PIGG	Glycosylphosphatidylinositol(GPI)-anchor biosynthesis
hsa00601 Glycosphingolipid biosynthesis - lacto and neolacto series	GCNT2	Glycosphingolipid biosynthesis - lacto and neolacto series
hsa00565 Ether lipid metabolism	UGT8	Glycosphingolipid biosynthesis - lacto and neolacto series
hsa00601 Glycosphingolipid biosynthesis - lacto and neolacto series	B3GNT5	Glycosphingolipid biosynthesis - lacto and neolacto series
hsa00601 Glycosphingolipid biosynthesis - lacto and neolacto series	ST3GAL4	Glycosphingolipid biosynthesis - lacto and neolacto series
hsa00601 Glycosphingolipid biosynthesis - lacto and neolacto series	B4GALT4	Glycosphingolipid biosynthesis - lacto and neolacto series
hsa00601 Glycosphingolipid biosynthesis - lacto and neolacto series	FUT3	Glycosphingolipid biosynthesis - lacto and neolacto series
hsa00601 Glycosphingolipid biosynthesis - lacto and neolacto series	ST3GAL6	Glycosphingolipid biosynthesis - lacto and neolacto series
hsa00600 Sphingolipid metabolism	UGT8	Glycosphingolipid biosynthesis - ganglio series
hsa00604 Glycosphingolipid biosynthesis - ganglio series	ST6GALNAC6	Glycosphingolipid biosynthesis - ganglio series
hsa00604 Glycosphingolipid biosynthesis - ganglio series	B4GALNT1	Glycosphingolipid biosynthesis - ganglio series
hsa00531 Glycosaminoglycan degradation	HPSE	Glycosaminoglycan degradation
hsa00531 Glycosaminoglycan degradation	ARSB	Glycosaminoglycan degradation
hsa00531 Glycosaminoglycan degradation	IDUA	Glycosaminoglycan degradation
hsa00531 Glycosaminoglycan degradation	GNS	Glycosaminoglycan degradation
hsa00533 Glycosaminoglycan biosynthesis - keratan sulfate	CHST6	Glycosaminoglycan biosynthesis
hsa00533 Glycosaminoglycan biosynthesis - keratan sulfate	CHST4	Glycosaminoglycan biosynthesis
hsa00532 Glycosaminoglycan biosynthesis - chondroitin sulfate / dermatan sulfate	CHPF2	Glycosaminoglycan biosynthesis
hsa00534 Glycosaminoglycan biosynthesis - heparan sulfate / heparin	EXT1	Glycosaminoglycan biosynthesis
hsa00533 Glycosaminoglycan biosynthesis - keratan sulfate	B4GALT4	Glycosaminoglycan biosynthesis

## Sheet: Table S3
Table S3. Multivariate Cox analysis for overall survival and relapse-free survival within TNBC samples from TCGA dataset.
Symbol	Multivariate Cox analysis for overall survival					Multivariate Cox analysis for relapse-free survival
	HR	Lower 95%	Upper 95%	P value		HR	Lower 95%	Upper 95%	P value
CHST4	0.59873	0.449044	0.798314	0.000*	B4GALNT1	0.392629	0.205644	0.749634	0.005*
B3GALNT2	0.183836	0.0722182	0.467964	0.000*	CHST4	0.629583	0.397449	0.997298	0.049*
GNPTG	0.272592	0.111021	0.6693	0.005*	MAN2B2	0.143442	0.016709	1.2314	0.0766929
FUT3	0.61023	0.426743	0.872609	0.007*	ST3GAL6	0.397511	0.142247	1.11085	0.0784979
PIGV	0.314221	0.123288	0.800845	0.015*	CHST6	0.676921	0.431128	1.06285	0.0900426
EXT1	0.400047	0.161469	0.991134	0.048*	MGAT4B	0.225045	0.0392467	1.29043	0.0941674
HPSE	1.88603	1.00215	3.5495	0.049*	PIGG	0.230532	0.0384131	1.38351	0.108514
DDOST	0.249267	0.0605143	1.02677	0.0544313	B3GNT5	2.51581	0.769134	8.2291	0.127049
ST3GAL6	0.573731	0.323122	1.01871	0.05787	MAN1C1	0.569569	0.272581	1.19014	0.134391
MAN2B1	0.291275	0.0776811	1.09217	0.0673671	PIGV	0.342947	0.0765916	1.53558	0.161755
GNS	0.391482	0.13671	1.12104	0.0806183	GNPTG	0.335246	0.0723611	1.55318	0.162384
ST3GAL4	1.65424	0.906041	3.02031	0.10127	ST3GAL4	1.89047	0.679394	5.26039	0.222601
B4GALNT1	0.730798	0.496315	1.07606	0.112145	PLOD3	0.647127	0.272944	1.53428	0.323104
MOGS	0.467399	0.162466	1.34466	0.158337	C1GALT1	1.58253	0.621673	4.02848	0.335613
PLOD3	0.593403	0.285987	1.23127	0.161117	UGT8	1.29992	0.744028	2.27115	0.356856
B3GNT5	1.68878	0.786495	3.62617	0.178957	IDUA	0.672413	0.28543	1.58406	0.363981
PIGB	0.419057	0.117187	1.49853	0.18096	GNS	0.489644	0.0970428	2.47057	0.387195
IDUA	0.680857	0.379519	1.22146	0.197361	PIGB	0.489157	0.0965581	2.47804	0.387709
ARSB	0.61191	0.204988	1.82661	0.378722	FUT3	0.830233	0.530478	1.29937	0.415597
CHST6	0.882633	0.630438	1.23571	0.467111	GCNT2	1.39868	0.606668	3.22468	0.431112
ST6GALNAC6	1.40813	0.498344	3.97887	0.518399	ARSB	0.624768	0.157431	2.47941	0.503601
CHPF2	0.770526	0.305163	1.94555	0.581208	ST6GALNAC6	0.615742	0.122588	3.09278	0.555947
MAN2B2	0.741119	0.19099	2.87585	0.664977	RPN1	1.67053	0.296047	9.42642	0.56109
RPN1	1.22252	0.298785	5.00213	0.779869	B3GALNT2	1.69917	0.151142	19.1024	0.667618
UGT8	1.05875	0.685812	1.63449	0.79666	ALG3	0.770789	0.170561	3.4833	0.73514
LFNG	1.07951	0.53885	2.16265	0.829133	B4GALT4	1.21233	0.313266	4.69171	0.780342
MAN1C1	0.950707	0.590846	1.52974	0.834999	HPSE	1.09803	0.525557	2.29409	0.803544
MGAT4B	1.12673	0.366337	3.46542	0.835115	GALNT10	0.902617	0.345708	2.35667	0.834259
ALG3	1.09765	0.429741	2.80362	0.845603	MAN2B1	0.870543	0.23222	3.26347	0.837079
C1GALT1	0.954324	0.475276	1.91622	0.895423	EXT1	0.84317	0.0865911	8.21026	0.88321
GCNT2	1.02513	0.519906	2.0213	0.942888	LFNG	0.956808	0.387379	2.36327	0.923754
GALNT10	0.985846	0.451264	2.15371	0.97148	DDOST	0.923593	0.168145	5.07313	0.927132
B4GALT4	1.00869	0.366339	2.77737	0.986641	CHPF2	0.944598	0.200569	4.44868	0.942531
PIGG	1.00535	0.304206	3.3225	0.993023	MOGS	0.976763	0.148799	6.41179	0.980462
HR, hazard ratio. * p < 0.05

## Sheet: Table S4
Table S4. The top 10 glycogenes with most differential correlation between glycogenes and CNA/DM.
Regulatory factor	Symbol	Correlation		Changed value	Function group
		TNBC	non-TNBC
CNA	CHPF2	0.672447	0.329695	0.342751	Glycosaminoglycan biosynthesis
CNA	MGAT4B	0.591661	0.250869	0.340792	N-glycan biosynthesis
CNA	MOGS	0.520816	0.211464	0.309352	N-glycan biosynthesis
CNA	HPSE	0.277278	-0.0213618	0.29864	Glycosaminoglycan degradation
CNA	GCNT2	0.373904	0.109664	0.26424	Glycosphingolipid biosynthesis - lacto and neolacto series
CNA	C1GALT1	0.346368	0.085298	0.26107	O-glycan biosynthesis
CNA	B3GNT5	0.28014	0.0201414	0.259999	Glycosphingolipid biosynthesis - lacto and neolacto series
CNA	GNPTG	0.565997	0.313067	0.252931	N-glycan biosynthesis
CNA	RPN1	0.628348	0.376842	0.251506	N-glycan biosynthesis
CNA	ARSB	0.277844	0.0624579	0.215386	Glycosaminoglycan degradation
DM	PIGB	-0.43447	0.152375	-0.586845	Glycosylphosphatidylinositol(GPI)-anchor biosynthesis
DM	ALG3	-0.402463	-0.127768	-0.274695	N-glycan biosynthesis
DM	CHST6	-0.422071	-0.169716	-0.252355	Glycosaminoglycan biosynthesis
DM	FUT3	-0.302178	-0.544172	0.241995	Glycosphingolipid biosynthesis - lacto and neolacto series
DM	CHPF2	-0.336489	-0.135554	-0.200935	Glycosaminoglycan biosynthesis
DM	UGT8	-0.535909	-0.348229	-0.18768	Glycosphingolipid biosynthesis - lacto and neolacto series
DM	UGT8	-0.535909	-0.348229	-0.18768	Glycosphingolipid biosynthesis - ganglio series
DM	B3GNT5	-0.443739	-0.301072	-0.142667	Glycosphingolipid biosynthesis - lacto and neolacto series
DM	ST3GAL4	-0.410293	-0.276398	-0.133895	Glycosphingolipid biosynthesis - lacto and neolacto series
DM	RPN1	-0.323486	-0.191424	-0.132062	N-glycan biosynthesis
DM	LFNG	-0.143832	-0.274065	0.130234	O-glycan biosynthesis

## Sheet: Table S5 
Table S5. TNBC-specific TF network.
TFs symbol	Entrez ID	Number	Glycogenes
AR	367	7	ST3GAL6, HPSE, IDUA, MAN1C1, B3GNT5, GNPTG, B4GALT4
TCF7L2	6934	6	HPSE, LFNG, CHST6, PIGG, PIGV, MAN1C1
E2F6	1876	5	CHST4, DDOST, MAN2B2, FUT3, PLOD3
NFIB	4781	5	MGAT4B, IDUA, LFNG, CHST6, PLOD3
TAF7	6879	5	DDOST, MAN2B2, MAN2B1, UGT8, MOGS
ZNF622	90441	5	ST3GAL6, FUT3, CHPF2, C1GALT1, ST3GAL4
CBFB	865	4	ST3GAL6, IDUA, CHST6, UGT8
ETV5	2119	4	GCNT2, PIGG, B4GALT4, PLOD3
GATA3	2625	4	EXT1, GCNT2, UGT8, B4GALT4
RUNX1T1	862	4	ARSB, CHPF2, GALNT10, MAN1C1
ATF4	468	3	CHPF2, GALNT10, ST3GAL4
BCL11A	53335	3	EXT1, ST3GAL4, UGT8
BMI1	648	3	ST3GAL6, GALNT10, B3GNT5
BRD9	65980	3	MGAT4B, GALNT10, PIGV
CBX3	11335	3	ALG3, ST6GALNAC6, GNPTG
CDK7	1022	3	B4GALNT1, GCNT2, GALNT10
CTBP2	1488	3	GCNT2, RPN1, B4GALT4
DAXX	1616	3	DDOST, GNS, C1GALT1
EGR1	1958	3	HPSE, MOGS, GNPTG
EGR2	1959	3	DDOST, GCNT2, ST6GALNAC6
ETS2	2114	3	MAN2B1, PIGV, B3GNT5
FOXK2	3607	3	HPSE, DDOST, GNPTG
FOXP1	27086	3	B4GALNT1, GCNT2, RPN1
GATA6	2627	3	MGAT4B, FUT3, GNS
GATAD1	57798	3	IDUA, ARSB, PIGG
HES1	3280	3	GNS, CHPF2, RPN1
HEY1	23462	3	MAN2B2, IDUA, ARSB
HMGN1	3150	3	CHPF2, GALNT10, GNPTG
ING5	84289	3	DDOST, MAN2B1, PIGV
JUN	3725	3	ST3GAL6, B3GALNT2, B3GNT5
KDM5B	10765	3	B3GALNT2, ST6GALNAC6, ST3GAL4
L3MBTL2	83746	3	MAN1C1, B4GALT4, PLOD3
MBD1	4152	3	MGAT4B, MAN2B1, CHST6
MBD2	8932	3	CHST4, C1GALT1, MOGS
MBD4	8930	3	B3GALNT2, C1GALT1, MAN1C1
MCM5	4174	3	LFNG, ST3GAL4, PLOD3
MEF2B	100271849	3	GCNT2, IDUA, MAN2B1
MEF2D	4209	3	CHPF2, C1GALT1, UGT8
MTA2	9219	3	B4GALNT1, GALNT10, PIGB
MYNN	55892	3	ST3GAL6, GCNT2, IDUA
NFIA	4774	3	ST3GAL6, MGAT4B, B4GALT4
NFKBIZ	64332	3	B3GALNT2, GCNT2, MOGS
NFXL1	152518	3	EXT1, FUT3, PIGG
NFYA	4800	3	HPSE, MOGS, B3GNT5
NFYC	4802	3	ALG3, MAN2B1, ST3GAL4
NOTCH1	4851	3	DDOST, EXT1, C1GALT1
NR2C1	7181	3	DDOST, PIGV, RPN1
NR2F1	7025	3	ST6GALNAC6, GALNT10, PLOD3
NR4A1	3164	3	DDOST, B4GALNT1, CHST6
NSD2	7468	3	ALG3, DDOST, PIGG
PBX2	5089	3	ST3GAL6, IDUA, MOGS
RBM14	10432	3	GNS, IDUA, GNPTG
RBM22	55696	3	B4GALNT1, ST6GALNAC6, CHPF2
RBM25	58517	3	MAN2B2, CHST6, ST3GAL4
RBM39	9584	3	ST3GAL6, MAN2B2, PLOD3
RELA	5970	3	GCNT2, CHST6, UGT8
RELB	5971	3	ST3GAL6, MAN2B1, CHST6
RERE	473	3	B3GALNT2, IDUA, C1GALT1
RXRA	6256	3	HPSE, MAN1C1, ST3GAL4
SIN3B	23309	3	CHST4, LFNG, MAN2B1
SLC30A9	10463	3	PIGG, PIGV, ST3GAL4
SMAD5	4090	3	PIGV, UGT8, MOGS
SMARCE1	6605	3	CHPF2, ST3GAL4, MOGS
SREBF2	6721	3	DDOST, CHST6, ST3GAL4
SYNCRIP	10492	3	EXT1, CHPF2, B3GNT5
TBX3	6926	3	MGAT4B, LFNG, ARSB
TCF7L1	83439	3	CHPF2, MOGS, B3GNT5
TFAP2C	7022	3	ST6GALNAC6, CHPF2, PLOD3
TFAP4	7023	3	HPSE, C1GALT1, B4GALT4
TFDP1	7027	3	ST3GAL6, CHPF2, GALNT10
TSC22D4	81628	3	B3GALNT2, IDUA, B4GALT4
TSHZ1	10194	3	HPSE, ST6GALNAC6, C1GALT1
U2AF2	11338	3	GCNT2, GNS, MOGS
WT1	7490	3	ST6GALNAC6, PIGG, RPN1
XRCC3	7517	3	B3GALNT2, DDOST, MAN2B2
ZBTB17	7709	3	ST6GALNAC6, C1GALT1, PIGB
ZBTB48	3104	3	DDOST, PIGG, PIGV
ZBTB49	166793	3	RPN1, UGT8, MOGS
ZBTB5	9925	3	EXT1, MAN2B1, PIGV
ZFP3	124961	3	LFNG, CHPF2, RPN1
ZFP41	286128	3	FUT3, B4GALNT1, PIGG
ZNF197	10168	3	MAN2B2, FUT3, PLOD3
ZNF23	7571	3	ST3GAL6, CHST6, B4GALT4
ZNF24	7572	3	EXT1, ST6GALNAC6, CHPF2
ZNF311	282890	3	CHST4, MAN2B2, MAN2B1
ZNF362	149076	3	MAN2B1, MAN1C1, UGT8
ZNF394	84124	3	HPSE, MAN2B2, ST6GALNAC6
ZNF404	342908	3	CHST4, IDUA, GNPTG
ZNF449	203523	3	FUT3, GNS, LFNG
ZNF488	118738	3	MAN2B1, PIGV, ST3GAL4
ZNF493	284443	3	EXT1, GNS, CHPF2
ZNF547	284306	3	FUT3, CHST6, UGT8
ZNF662	389114	3	GALNT10, B3GNT5, PLOD3
ZSCAN29	146050	3	CHST4, DDOST, GCNT2
ZSCAN5A	79149	3	GALNT10, ST3GAL4, PLOD3
ZXDB	158586	3	DDOST, GCNT2, RPN1
ARID4B	51742	2	ARSB, PIGV
ARRB1	408	2	FUT3, MAN1C1
ASH2L	9070	2	GCNT2, B3GNT5
ATF7	11016	2	ST6GALNAC6, GNPTG
BACH2	60468	2	CHPF2, UGT8
BCL6B	255877	2	LFNG, UGT8
BCOR	54880	2	B4GALNT1, UGT8
BHLHE40	8553	2	MGAT4B, ST6GALNAC6
BRCA1	672	2	FUT3, C1GALT1
CEBPG	1054	2	DDOST, ST3GAL4
COPS2	9318	2	CHST4, C1GALT1
DIDO1	11083	2	MOGS, GNPTG
DPF2	5977	2	HPSE, PIGV
E2F7	144455	2	FUT3, B3GNT5
E2F8	79733	2	ST6GALNAC6, UGT8
ELF1	1997	2	HPSE, GNPTG
ELF3	1999	2	MGAT4B, GCNT2
ELF4	2000	2	ST3GAL4, MOGS
ELK3	2004	2	EXT1, GALNT10
ELL2	22936	2	IDUA, B3GNT5
ERF	2077	2	GNPTG, PLOD3
ETV4	2118	2	B3GALNT2, CHST6
ETV6	2120	2	GCNT2, ST3GAL4
FOSL1	8061	2	MGAT4B, B3GALNT2
FOXJ2	55810	2	MGAT4B, MAN2B2
FOXP2	93986	2	MGAT4B, FUT3
FUS	2521	2	B3GALNT2, GNS
GATA2	2624	2	EXT1, UGT8
GATAD2B	57459	2	B3GALNT2, GALNT10
GLIS1	148979	2	MAN2B1, MOGS
GMEB1	10691	2	ST3GAL6, B3GNT5
GRHL2	79977	2	GCNT2, PIGB
GTF2A2	2958	2	EXT1, RPN1
H2AFZ	3015	2	GNS, MAN2B1
HDAC3	8841	2	ST3GAL6, UGT8
HNRNPK	3190	2	ALG3, DDOST
HOXA4	3201	2	DDOST, ST3GAL4
IKZF1	10320	2	MAN2B1, PIGG
IKZF5	64376	2	MAN2B2, CHPF2
IRF3	3661	2	GCNT2, CHPF2
IRF4	3662	2	FUT3, C1GALT1
JARID2	3720	2	IDUA, ST3GAL4
KAT2B	8850	2	GNS, IDUA
KDM4A	9682	2	PIGG, GNPTG
KDM4B	23030	2	IDUA, MAN2B1
KLF13	51621	2	IDUA, C1GALT1
KLF8	11279	2	IDUA, UGT8
MAFG	4097	2	ST3GAL4, UGT8
MAFK	7975	2	MGAT4B, FUT3
MAX	4149	2	B3GALNT2, CHST6
MCM2	4171	2	FUT3, GNPTG
MED12	9968	2	DDOST, MAN2B1
MLX	6945	2	ST3GAL4, GNPTG
MYBL2	4605	2	IDUA, B3GNT5
MYC	4609	2	MAN2B2, GNPTG
NFATC1	4772	2	MGAT4B, PLOD3
NFIC	4782	2	CHST4, GALNT10
NFRKB	4798	2	B3GALNT2, EXT1
NR2F2	7026	2	ST3GAL6, PIGV
NUFIP1	26747	2	ST6GALNAC6, IDUA
PAX6	5080	2	ALG3, ST6GALNAC6
PBX1	5087	2	C1GALT1, ST3GAL4
PHF5A	84844	2	CHST6, RPN1
PKNOX1	5316	2	IDUA, PIGG
POLR2B	5431	2	MGAT4B, CHPF2
PTTG1	9232	2	GNS, CHPF2
RARA	5914	2	EXT1, ST3GAL4
RBL1	5933	2	ALG3, C1GALT1
RBM34	23029	2	MGAT4B, PIGB
RBPJ	3516	2	HPSE, MGAT4B
RFX3	5991	2	HPSE, GNPTG
RUNX1	861	2	B3GNT5, PLOD3
RXRB	6257	2	PIGV, C1GALT1
SAP30	8819	2	CHST4, GCNT2
SETDB1	9869	2	MAN2B2, CHST6
SKI	6497	2	MAN2B2, CHST6
SMAD3	4088	2	GCNT2, B3GNT5
SNRNP70	6625	2	EXT1, GNS
SOX13	9580	2	MAN2B2, LFNG
SOX6	55553	2	CHST6, PLOD3
SP1	6667	2	MAN2B2, CHPF2
SP4	6671	2	MAN2B2, CHST6
SPI1	6688	2	MAN2B1, GNPTG
SREBF1	6720	2	ARSB, CHPF2
SSRP1	6749	2	PIGG, GNPTG
STAG1	10274	2	LFNG, GNPTG
STAT3	6774	2	C1GALT1, UGT8
STAT5A	6776	2	CHST4, PIGG
SUPT5H	6829	2	LFNG, MAN1C1
TAF3	83860	2	ST3GAL6, B3GNT5
TAF6	6878	2	MGAT4B, PIGG
TCF3	6929	2	B3GALNT2, MOGS
TEAD2	8463	2	EXT1, UGT8
TFAP2A	7020	2	MAN2B2, B3GNT5
TP53	7157	2	FUT3, PLOD3
TRIM24	8805	2	EXT1, B4GALNT1
TTF2	8458	2	GCNT2, ST6GALNAC6
UBTF	7343	2	ALG3, ST3GAL6
VDR	7421	2	FUT3, LFNG
VEZF1	7716	2	CHST4, ALG3
WRNIP1	56897	2	MAN2B2, C1GALT1
XRN2	22803	2	EXT1, GNS
YBX1	4904	2	PIGG, RPN1
YY1	7528	2	CHST4, FUT3
ZBTB2	57621	2	CHST4, ST3GAL6
ZBTB20	26137	2	CHST4, ST3GAL4
ZBTB25	7597	2	CHST6, CHPF2
ZBTB7B	51043	2	DDOST, MAN1C1
ZBTB8A	653121	2	RPN1, ST3GAL4
ZEB2	9839	2	GNS, CHPF2
ZNF132	7691	2	CHST4, B4GALNT1
ZNF140	7699	2	CHPF2, B4GALT4
ZNF18	7566	2	MAN2B2, CHST6
ZNF195	7748	2	MGAT4B, B4GALNT1
ZNF211	10520	2	ALG3, PIGV
ZNF214	7761	2	CHPF2, PLOD3
ZNF217	7764	2	HPSE, MAN2B1
ZNF223	7766	2	ALG3, PIGG
ZNF274	10782	2	GCNT2, UGT8
ZNF280C	55609	2	EXT1, B3GNT5
ZNF302	55900	2	ALG3, DDOST
ZNF335	63925	2	ST3GAL4, PLOD3
ZNF350	59348	2	B4GALNT1, UGT8
ZNF354B	117608	2	MAN2B2, PIGB
ZNF366	167465	2	LFNG, GALNT10
ZNF395	55893	2	EXT1, ST6GALNAC6
ZNF444	55311	2	HPSE, PIGG
ZNF48	197407	2	MAN2B1, MOGS
ZNF510	22869	2	ALG3, MOGS
ZNF521	25925	2	LFNG, UGT8
ZNF529	57711	2	ST3GAL4, PLOD3
ZNF548	147694	2	ALG3, C1GALT1
ZNF558	148156	2	GCNT2, IDUA
ZNF580	51157	2	B3GALNT2, MAN2B2
ZNF584	201514	2	GCNT2, B4GALT4
ZNF592	9640	2	ARSB, CHST6
ZNF621	285268	2	GCNT2, PLOD3
ZNF652	22834	2	CHST4, ALG3
ZNF670	93474	2	GNS, C1GALT1
ZNF687	57592	2	CHST4, B3GALNT2
ZNF750	79755	2	HPSE, PIGV
ZNF792	126375	2	FUT3, RPN1
ZNF83	55769	2	CHST4, EXT1
ZNF92	168374	2	MGAT4B, PLOD3
ZSCAN18	65982	2	ST3GAL6, UGT8
AEBP2	121536	1	ST3GAL4
ARID3A	1820	1	MAN2B2
ARNTL	406	1	HPSE
ATF1	466	1	IDUA
ATF2	1386	1	HPSE
BACH1	571	1	ALG3
BCAT1	586	1	LFNG
BDP1	55814	1	RPN1
BRD1	23774	1	PIGV
CAVIN1	284119	1	C1GALT1
CBX8	57332	1	LFNG
CC2D1A	54862	1	B3GNT5
CDC5L	988	1	B4GALT4
CDK6	1021	1	GALNT10
CEBPA	1050	1	C1GALT1
CEBPB	1051	1	CHST6
CHD7	55636	1	UGT8
CHD8	57680	1	MOGS
CLOCK	9575	1	GALNT10
CREB1	1385	1	RPN1
CREM	1390	1	C1GALT1
CTBP1	1487	1	DDOST
CTCF	10664	1	MAN2B1
CTNNB1	1499	1	PIGG
CUX1	1523	1	GALNT10
DACH1	1602	1	ARSB
DDX20	11218	1	LFNG
DDX5	1655	1	MGAT4B
DEK	7913	1	ALG3
DMAP1	55929	1	ST3GAL4
DNMT3B	1789	1	B3GNT5
DRAP1	10589	1	ST6GALNAC6
E2F1	1869	1	PIGG
E2F2	1870	1	LFNG
E2F3	1871	1	B4GALNT1
E2F4	1874	1	B3GALNT2
E4F1	1877	1	B3GALNT2
EBF1	1879	1	HPSE
EHMT2	10919	1	C1GALT1
ELK1	2002	1	CHST6
EP400	57634	1	B4GALT4
ERCC2	2068	1	GALNT10
ERCC3	2071	1	PIGG
ERCC6	2074	1	ST3GAL4
ESR1	2099	1	PIGV
ESRRA	2101	1	ARSB
EWSR1	2130	1	RPN1
EZH1	2145	1	ALG3
EZH2	2146	1	CHPF2
FOS	2353	1	PLOD3
FOSL2	2355	1	EXT1
FOXA1	3169	1	ARSB
FOXD2	2306	1	LFNG
FOXM1	2305	1	LFNG
FOXO1	2308	1	MAN1C1
GABPA	2551	1	UGT8
GABPB1	2553	1	PIGV
GLI2	2736	1	GALNT10
GLIS2	84662	1	GALNT10
GTF2B	2959	1	EXT1
GTF2I	2969	1	IDUA
GTF3C2	2976	1	MAN2B1
HCFC1	3054	1	GALNT10
HDAC1	3065	1	B3GNT5
HDAC6	10013	1	UGT8
HDAC8	55869	1	DDOST
HHEX	3087	1	CHPF2
HIC1	3090	1	UGT8
HINFP	25988	1	RPN1
HLF	3131	1	ST3GAL4
HMG20A	10363	1	CHST4
HNRNPL	3191	1	ST3GAL4
HOXA6	3203	1	MOGS
HOXC9	3225	1	MAN1C1
IKZF2	22807	1	C1GALT1
ING2	3622	1	GCNT2
IRF2	3660	1	GCNT2
IRF5	3663	1	MAN2B2
IRF9	10379	1	EXT1
JMJD6	23210	1	RPN1
JUND	3727	1	PIGG
KAT2A	2648	1	DDOST
KAT5	10524	1	PLOD3
KDM2B	84678	1	PIGV
KDM3A	55818	1	B4GALNT1
KDM5C	8242	1	PIGV
KDM6A	7403	1	HPSE
KDM6B	23135	1	HPSE
KLF5	688	1	CHPF2
KLF6	1316	1	GCNT2
LARP7	51574	1	MOGS
LCORL	254251	1	MAN2B1
LEO1	123169	1	PIGV
LIN9	286826	1	B3GALNT2
LMNB1	4001	1	PIGV
LMO2	4005	1	MAN1C1
LYL1	4066	1	LFNG
MAFF	23764	1	CHST6
MAZ	4150	1	GCNT2
MCM7	4176	1	B4GALT4
MED1	5469	1	ALG3
MEF2A	4205	1	MAN1C1
MEIS2	4212	1	RPN1
MIER1	57708	1	GCNT2
MIER2	54531	1	B4GALT4
MTA1	9112	1	CHST6
MTA3	57504	1	B4GALT4
MXI1	4601	1	RPN1
MYB	4602	1	GALNT10
MYH11	4629	1	LFNG
MZF1	7593	1	GCNT2
NATP	11	1	PIGB
NBN	4683	1	B4GALNT1
NCOA3	8202	1	IDUA
NCOR2	9612	1	GCNT2
NFATC3	4775	1	MGAT4B
NFIL3	4783	1	MGAT4B
NFYB	4801	1	ALG3
NIPBL	25836	1	IDUA
NR3C1	2908	1	ALG3
PAF1	54623	1	PIGG
PATZ1	23598	1	B4GALNT1
PBX3	5090	1	GNS
PCBP1	5093	1	ST6GALNAC6
PCBP2	5094	1	CHST4
PCGF2	7703	1	ALG3
PHB2	11331	1	GNS
PLRG1	5356	1	UGT8
PML	5371	1	FUT3
POLR2A	5430	1	B3GALNT2
POLR2G	5436	1	MAN2B2
POU2F2	5452	1	MAN1C1
PPARG	5468	1	ST3GAL4
PRAME	23532	1	PIGV
PRDM1	639	1	LFNG
PRDM11	56981	1	ST6GALNAC6
PRDM2	7799	1	ST6GALNAC6
PRDM6	93166	1	GCNT2
PROX1	5629	1	ALG3
PRPF4	9128	1	GNPTG
PTBP1	5725	1	B3GNT5
RB1	5925	1	PIGG
RBAK	57786	1	RPN1
RBBP5	5929	1	IDUA
RBCK1	10616	1	MAN2B1
RBM15	64783	1	ST6GALNAC6
RCOR1	23186	1	FUT3
RCOR2	283248	1	B4GALT4
REPIN1	29803	1	GNPTG
REST	5978	1	GNS
RFX2	5990	1	HPSE
RFX5	5993	1	ST3GAL4
RING1	6015	1	CHST4
RLF	6018	1	B3GALNT2
RNF2	6045	1	FUT3
RUNX2	860	1	ST3GAL6
RUNX3	864	1	PIGG
RXRG	6258	1	EXT1
SALL1	6299	1	PLOD3
SAP130	79595	1	ARSB
SETD1A	9739	1	HPSE
SIN3A	25942	1	PLOD3
SIX4	51804	1	GNPTG
SIX5	147912	1	IDUA
SKIL	6498	1	ARSB
SMAD2	4087	1	PIGG
SMAD4	4089	1	FUT3
SMARCA4	6597	1	PIGG
SMARCB1	6598	1	LFNG
SNAI2	6591	1	B3GALNT2
SND1	27044	1	PIGG
SOX5	6660	1	ST6GALNAC6
SOX9	6662	1	GCNT2
SRF	6722	1	DDOST
STAT1	6772	1	FUT3
TAL1	6886	1	C1GALT1
TARDBP	23435	1	UGT8
TBL1X	6907	1	B3GNT5
TBL1XR1	79718	1	GCNT2
TBX21	30009	1	PIGG
TCF7	6932	1	B3GNT5
TDRD3	81550	1	MAN2B1
TEAD1	7003	1	DDOST
TEAD3	7005	1	GCNT2
TERF1	7013	1	RPN1
TET2	54790	1	RPN1
TET3	200424	1	B3GNT5
TFE3	7030	1	ST3GAL6
THAP11	57215	1	DDOST
THRA	7067	1	B3GNT5
THRAP3	9967	1	HPSE
TP63	8626	1	EXT1
TP73	7161	1	LFNG
TRIM22	10346	1	FUT3
TTF1	7270	1	C1GALT1
U2AF1	7307	1	PIGG
USF1	7391	1	EXT1
USF2	7392	1	ARSB
XRCC5	7520	1	MOGS
YY2	404281	1	B4GALNT1
ZBED1	9189	1	MAN1C1
ZBED5	58486	1	ALG3
ZBTB10	65986	1	MAN2B2
ZBTB11	27107	1	FUT3
ZBTB12	221527	1	MAN2B1
ZBTB33	10009	1	MGAT4B
ZBTB7A	51341	1	DDOST
ZC3H11A	9877	1	B3GALNT2
ZFAT	57623	1	ARSB
ZFP36	7538	1	ST3GAL4
ZGPAT	84619	1	B3GALNT2
ZHX2	22882	1	UGT8
ZIK1	284307	1	C1GALT1
ZKSCAN1	7586	1	MAN2B2
ZMIZ1	57178	1	LFNG
ZNF133	7692	1	PIGV
ZNF138	7697	1	MGAT4B
ZNF146	7705	1	B3GALNT2
ZNF155	7711	1	PIGG
ZNF169	169841	1	MAN1C1
ZNF174	7727	1	RPN1
ZNF175	7728	1	EXT1
ZNF19	7567	1	GCNT2
ZNF2	7549	1	UGT8
ZNF205	7755	1	GNPTG
ZNF207	7756	1	CHPF2
ZNF248	57209	1	MAN2B2
ZNF26	7574	1	GCNT2
ZNF280D	54816	1	LFNG
ZNF282	8427	1	DDOST
ZNF292	23036	1	EXT1
ZNF3	7551	1	ST3GAL4
ZNF300	91975	1	FUT3
ZNF318	24149	1	ARSB
ZNF331	55422	1	LFNG
ZNF34	80778	1	GALNT10
ZNF354C	30832	1	HPSE
ZNF384	171017	1	MGAT4B
ZNF398	57541	1	ST3GAL4
ZNF423	23090	1	ST3GAL4
ZNF473	25888	1	MAN2B2
ZNF491	126069	1	MGAT4B
ZNF512	84450	1	UGT8
ZNF524	147807	1	CHST6
ZNF544	27300	1	B3GNT5
ZNF555	148254	1	RPN1
ZNF577	84765	1	FUT3
ZNF585B	92285	1	RPN1
ZNF600	162966	1	CHST6
ZNF610	162963	1	UGT8
ZNF614	80110	1	PIGV
ZNF623	9831	1	B4GALT4
ZNF624	57547	1	PIGB
ZNF629	23361	1	MOGS
ZNF644	84146	1	MGAT4B
ZNF658	26149	1	C1GALT1
ZNF692	55657	1	GALNT10
ZNF704	619279	1	B3GNT5
ZNF707	286075	1	B3GNT5
ZNF747	65988	1	RPN1
ZNF76	7629	1	ST3GAL6
ZNF766	90321	1	DDOST
ZNF770	54989	1	B3GALNT2
ZNF830	91603	1	CHST4
ZNF837	116412	1	MAN2B1
ZSCAN23	222696	1	MOGS
ZZZ3	26009	1	RPN1
